# Supplementary material for: The Loss of Soil Parent Material: Detecting and Measuring the Erosion of Saprolite
Source: MDPI journal article supplement (doi:10.3390/soilsystems8020043), 2024-04-09
Supplement: s1 [file s1]

## Supplementary Information:

**Table S1.** Precipitation and temperature data collected at the Morungaba Automated Weather Station over the duration of the experiment.

| Period                  | Rain, mm | Temp max | Temp min |
|-------------------------|----------|----------|----------|
| 17/03/2021 – 01/04/2021 | 15.2     | 33.7     | 17.9     |
| 01/04/2021 – 30/04/2021 | 10.7     | 29.5     | 13.8     |
| 30/04/2021 – 26/05/2021 | 26.7     | 27.6     | 11.0     |
| 26/05/2021 – 17/06/2021 | 9.1      | 28.3     | 10.8     |
| 17/06/2021 – 22/07/2021 | 17.8     | 26.4     | 7.4      |

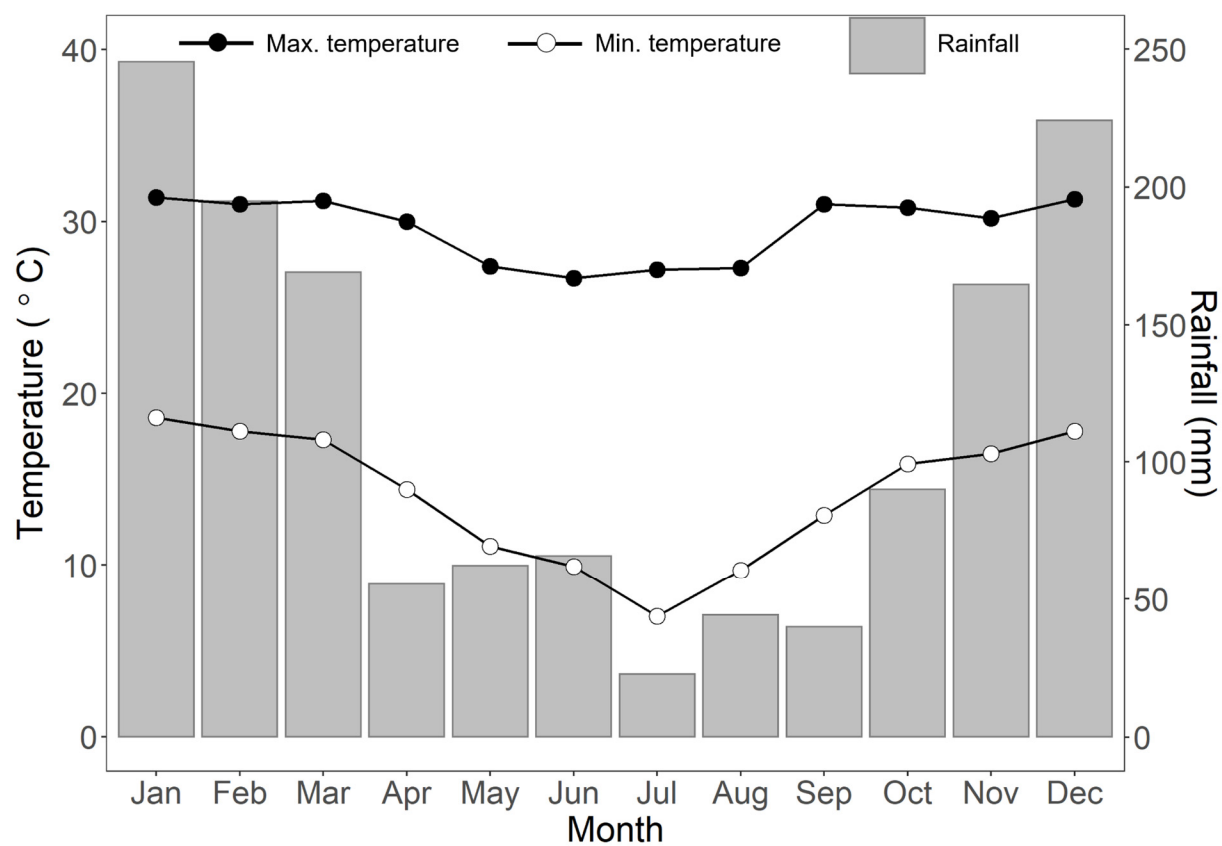

**Figure S1.** Typical temperature and precipitation profiles of the Morungaba-SP study site. Data sourced from Morungaba Automated Weather Station.
